# Supplementary figures and images for: Fufang Fanshiliu Decoction Revealed the Antidiabetic Effect through Modulating Inflammatory Response and Gut Microbiota Composition
Source: Hindawi journal article supplement (doi:10.1155/2022/3255401), 2022-10-10

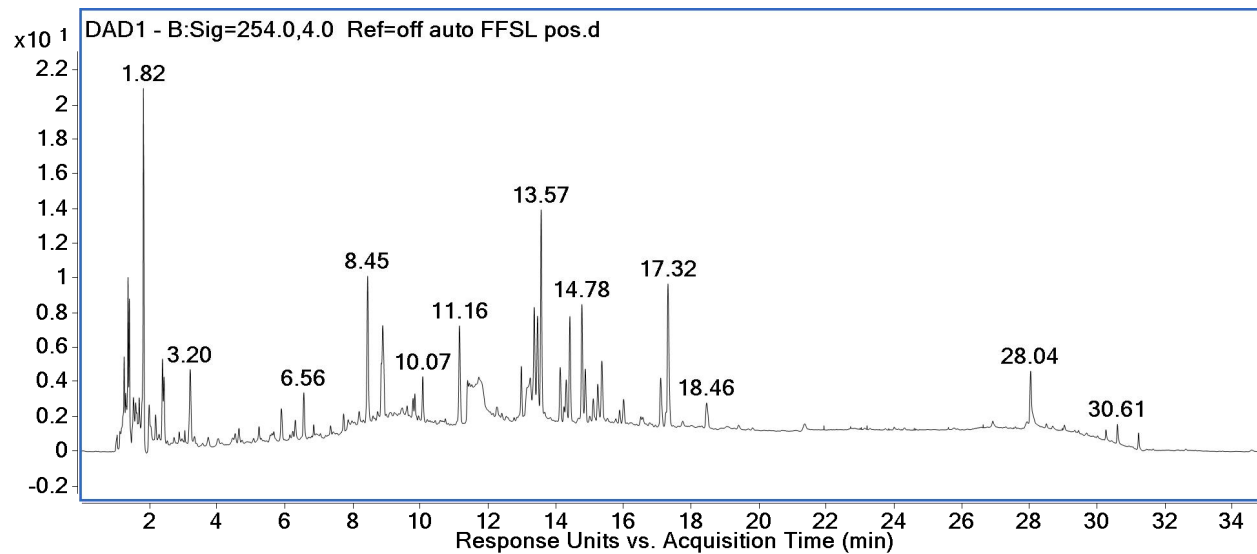

Supplement: f1 [file 3255401.f1.zip]
